# Supplementary material
Source: PubMed Central journal article supplement (PMC10552916)
Supplement: NIHMS1930713-supplement-Supplementary_Material.pdf [file NIHMS1930713-supplement-Supplementary_Material.pdf]

**Appendix 1. Characteristics of Nonhospital Abortion Patients Who Did and Did Not Respond to the Item About Sexual Orientation Identity, 2014**

| Characteristic               | Responded |       | Did not respond |     | <i>P</i> |
|------------------------------|-----------|-------|-----------------|-----|----------|
|                              | %         | n     | %               | n   |          |
| <b>Age</b>                   |           |       |                 |     |          |
| 15-19                        | 11.9      | 914   | 9.9             | 72  | 0.112    |
| 20-24                        | 35.1      | 2,691 | 26.2            | 190 | <.001    |
| 25-29                        | 26.8      | 2,052 | 25.3            | 183 | 0.38     |
| 30-34                        | 15.0      | 1,151 | 19.8            | 143 | <.001    |
| 35+                          | 11.1      | 848   | 18.8            | 136 | <.001    |
| <b>Race and ethnicity</b>    |           |       |                 |     |          |
| Non-Hispanic Black           | 28.1      | 2,150 | 24.9            | 180 | 0.07     |
| Non-Hispanic White           | 41.0      | 3,136 | 18.4            | 133 | <.001    |
| Non-Hispanic Other           | 8.5       | 652   | 12.3            | 89  | <.001    |
| Hispanic                     | 22.4      | 1,718 | 44.5            | 322 | <.001    |
| <b>Born in United States</b> |           |       |                 |     |          |
| Yes                          | 86.8      | 1,007 | 58.7            | 299 | <.001    |
| No                           | 13.2      | 6,649 | 41.3            | 425 | <.001    |
| <b>Relationship status</b>   |           |       |                 |     |          |
| Married                      | 13.5      | 1,033 | 21.1            | 153 | <.001    |
| Cohabiting                   | 31.5      | 2,408 | 27.8            | 201 | 0.04     |
| Never married                | 46.6      | 3,570 | 37.0            | 268 | <.001    |
| Previously married           | 8.4       | 645   | 14.1            | 102 | <.001    |

Jones RK, Jerman J, Charlton BM. Sexual orientation and exposure to violence among U.S. patients undergoing abortion. *Obstet Gynecol* 2018; 132. The authors provided this information as a supplement to their article.

|                              |      |       |      |     |       |
|------------------------------|------|-------|------|-----|-------|
| Education (age 20 and older) |      |       |      |     |       |
| Less than high school        | 7.3  | 490   | 23.5 | 153 | <.001 |
| High school or GED           | 27.5 | 1,854 | 35.0 | 228 | <.001 |
| Some college                 | 43.4 | 2,925 | 25.6 | 167 | <.001 |
| College graduate             | 21.8 | 1,473 | 16   | 104 | <.001 |
|                              |      |       |      |     |       |
| % of Federal Poverty Level   |      |       |      |     |       |
| <100%                        | 48.4 | 3,705 | 64.6 | 468 | <.001 |
| 100-199%                     | 26.1 | 1,998 | 21.1 | 153 | <.001 |
| 200+%                        | 25.5 | 1,953 | 14.2 | 103 | <.001 |
|                              |      |       |      |     |       |
| Prior births                 |      |       |      |     |       |
| 0                            | 42.0 | 3,216 | 26.0 | 188 | <.001 |
| 1 or more                    | 58.0 | 4,440 | 74.0 | 536 | <.001 |
|                              |      |       |      |     |       |
| Prior abortions              |      |       |      |     |       |
| 0 (comparison)               | 56.1 | 4,296 | 48.6 | 352 | <.001 |
| 1 or more                    | 43.9 | 3,360 | 51.4 | 372 | <.001 |
|                              |      |       |      |     |       |
| Total                        |      | 7,656 |      | 724 |       |

**Appendix 2. Characteristics and Exposure to Sexual and Physical Violence Among Nonhospital U.S. Abortion Patients, Among Heterosexuals and Sexual Minority Patients, 2014**

|                                     | Heterosexual |        |        | Any sexual minority |      |        |                 |
|-------------------------------------|--------------|--------|--------|---------------------|------|--------|-----------------|
|                                     | %            | 95% CI |        | 95% CI              |      |        |                 |
| <b>Age</b>                          |              |        |        |                     |      |        |                 |
| 15-19                               | 11.9         | 11.2   | - 12.7 | 12.0                | 9.2  | - 15.4 | 0.968           |
| 20-24                               | 34.7         | 33.6   | - 35.8 | 43.3                | 38.6 | - 48.1 | <b>&lt;.001</b> |
| 25-29                               | 26.8         | 25.8   | - 27.8 | 27.5                | 23.5 | - 32.0 | 0.728           |
| 30-34                               | 15.3         | 14.5   | - 16.1 | 10.6                | 8.0  | - 13.9 | <b>0.009</b>    |
| 35+                                 | 11.3         | 10.6   | - 12.1 | 6.6                 | 4.6  | - 9.4  | <b>0.003</b>    |
| <b>Race and ethnicity</b>           |              |        |        |                     |      |        |                 |
| Non-Hispanic Black                  | 28.0         | 26.9   | - 29.0 | 30.4                | 26.2 | - 34.9 | 0.284           |
| Non-Hispanic White                  | 41.3         | 40.1   | - 42.4 | 35.8                | 31.3 | - 40.4 | <b>0.025</b>    |
| Non-Hispanic Other                  | 8.5          | 7.8    | - 9.1  | 9.6                 | 7.2  | - 12.8 | 0.390           |
| Hispanic                            | 22.3         | 21.4   | - 23.3 | 24.2                | 20.4 | - 28.5 | 0.361           |
| <b>Relationship status</b>          |              |        |        |                     |      |        |                 |
| Married                             | 13.6         | 12.8   | - 14.4 | 12.0                | 9.2  | - 15.4 | 0.354           |
| Cohabiting                          | 31.6         | 30.5   | - 32.7 | 29.4                | 25.3 | - 33.9 | 0.351           |
| Never married                       | 46.5         | 45.3   | - 47.6 | 48.9                | 44.2 | - 53.7 | 0.326           |
| Previously married                  | 8.4          | 7.7    | - 9.0  | 9.6                 | 7.2  | - 12.8 | 0.351           |
| <b>Education (age 20 and older)</b> |              |        |        |                     |      |        |                 |
| Less than high school               | 7.0          | 6.4    | - 7.7  | 11.8                | 8.9  | - 15.4 | <b>0.001</b>    |

Jones RK, Jerman J, Charlton BM. Sexual orientation and exposure to violence among U.S. patients undergoing abortion. *Obstet Gynecol* 2018; 132. The authors provided this information as a supplement to their article.

|                                                      |      |      |        |      |      |        |                 |
|------------------------------------------------------|------|------|--------|------|------|--------|-----------------|
| High school or GED                                   | 27.1 | 26.0 | - 28.2 | 35.0 | 30.4 | - 40.0 | <b>0.001</b>    |
| Some college                                         | 43.5 | 42.3 | - 44.8 | 40.9 | 36.0 | - 46.0 | 0.320           |
| College graduate                                     | 22.4 | 21.4 | - 23.4 | 12.3 | 9.3  | - 16.0 | <b>&lt;.001</b> |
| <b>% of Federal Poverty Level</b>                    |      |      |        |      |      |        |                 |
| <100%                                                | 47.8 | 46.6 | - 48.9 | 59.3 | 54.6 | - 63.9 | <b>&lt;.001</b> |
| 100-199%                                             | 26.3 | 25.3 | - 27.3 | 22.4 | 18.6 | - 26.6 | <b>0.071</b>    |
| 200+%                                                | 25.9 | 24.9 | - 27.0 | 18.4 | 15.0 | - 22.3 | <b>0.001</b>    |
| <b>Prior births</b>                                  |      |      |        |      |      |        |                 |
| 0                                                    | 41.9 | 40.7 | - 43.0 | 44.7 | 40.0 | - 49.5 | 0.246           |
| 1 or more                                            | 58.2 | 57.0 | - 59.3 | 55.3 | 50.5 | - 60.0 | 0.246           |
| <b>Prior abortions</b>                               |      |      |        |      |      |        |                 |
| 0                                                    | 56.1 | 54.9 | - 57.2 | 56.7 | 52.0 | - 61.3 | 0.800           |
| 1 or more                                            | 43.9 | 42.8 | - 45.1 | 43.3 | 38.7 | - 48.1 | 0.800           |
| <b>Physical abuse by man involved in pregnancy</b>   |      |      |        |      |      |        |                 |
| Yes                                                  | 3.6  | 3.2  | - 4.0  | 9.9  | 7.4  | - 13.2 | <b>&lt;.001</b> |
| No                                                   | 96.4 | 96.0 | - 96.8 | 90.1 | 86.8 | - 92.6 | <b>&lt;.001</b> |
| <b>Sexual abuse by man involved in the pregnancy</b> |      |      |        |      |      |        |                 |
| Yes                                                  | 1.9  | 1.6  | - 2.2  | 8.4  | 6.1  | - 11.5 | <b>&lt;.001</b> |
| No                                                   | 98.2 | 97.8 | - 98.4 | 91.6 | 88.5 | - 93.9 | <b>&lt;.001</b> |
| <b>Pregnancy the result of forced sex</b>            |      |      |        |      |      |        |                 |
| Yes                                                  | 1.2  | 1.0  | - 1.5  | 4.1  | 2.6  | - 6.5  | <b>&lt;.001</b> |
| No                                                   | 97.9 | 97.5 | - 98.2 | 92.1 | 89.1 | - 94.3 | <b>&lt;.001</b> |
| Don't know                                           | 0.9  | 0.7  | - 1.1  | 3.8  | 2.4  | - 6.2  | <b>&lt;.001</b> |

Jones RK, Jerman J, Charlton BM. Sexual orientation and exposure to violence among U.S. patients undergoing abortion. *Obstet Gynecol* 2018; 132.

The authors provided this information as a supplement to their article.

©2018 American College of Obstetricians and Gynecologists.

|       |       |     |
|-------|-------|-----|
| Total | 7,231 | 425 |
|-------|-------|-----|

Note: *P* values in boldface type indicate the association was statistically significant at  $P < .05$ .

**Appendix 3. Odd Ratios for Logistic Regression Models Assessing Associations Between Sexual Minority Status and Exposure to Physical Abuse, Sexual Abuse, or Rape Among Nonhospital Abortion Patients, 2014**

|                 | Physical   |        |       |          | Sexual     |        |       | Forced Sex or Potential Rape |            |        |       |          |
|-----------------|------------|--------|-------|----------|------------|--------|-------|------------------------------|------------|--------|-------|----------|
|                 | Odds Ratio | 95% CI |       | <i>P</i> | Odds Ratio | 95% CI |       | <i>P</i>                     | Odds Ratio | 95% CI |       | <i>P</i> |
| Sexual minority | 2.8        | 2.0    | - 4.0 | <.001    | 4.7        | 3.2    | - 7.0 | <.001                        | 3.7        | 2.5    | - 5.5 | <.001    |
| Heterosexual    | 1.00       |        |       |          | 1.00       |        |       |                              | 1.00       |        |       |          |
| Total           | 7,553      |        |       |          | 7,555      |        |       |                              | 7,577      |        |       |          |

Note: Logistic regression models control for age, union status, race and ethnicity and poverty.
